# Supplementary material for: Selective neodymium recovery from model permanent magnets using cost-effective organic acid systems
Source: Royal Society of Chemistry journal article supplement (doi:10.1039/d3gc04800d), 2024-01-01
Supplement: d3gc04800d1.pdf [file d3gc04800d1.pdf]

# Selective neodymium recovery from model permanent magnets using cost-effective organic acid systems

Cristina Pozo-Gonzalo<sup>a\*12</sup>, Rabeeh Golmohammadzadeh<sup>a,†+</sup>, Munkhshur Myekhlai<sup>a+</sup>  
Henrique Bastos,<sup>a</sup> Glen B. Deacon<sup>b</sup>, Anthony E. Somers<sup>a</sup>

<sup>a</sup> Institute for Frontier Materials, Deakin University, Geelong, Victoria, 3200, Australia

<sup>b</sup> School of Chemistry, Monash University, Melbourne 3800, Australia

+Author equal contribution

\*Corresponding author: E-mail address: [cpg@deakin.edu.au](mailto:cpg@deakin.edu.au); [cpozo@icb.csic.es](mailto:cpozo@icb.csic.es) (C. Pozo-Gonzalo).

† Current address: Environment Protection Authority Victoria, EPA Science, Centre for Applied Sciences, Ernest Jones Drive, Macleod, Melbourne, Victoria, 3085, Australia.

## Experimental section

### 1. Materials and methods

#### 1.1. Materials

Neodymium (III) oxide (Nd<sub>2</sub>O<sub>3</sub>, 99.9% Merck) and iron (III) oxide (Fe<sub>2</sub>O<sub>3</sub>, >96% Sigma Aldrich) were used to mimic spent magnets components in the dissolution experiments. The chemicals used in this study were guanidine hydrochloride (GUC, >99% Merck), as a hydrogen bond acceptor (HBA) and DL-lactic acid (90%, Sigma Aldrich), and acetic acid (100%, Univar) as hydrogen bond donors (HBDs).

#### 1.2. Dissolution experiments

The leaching efficiency and selectivity of Nd<sub>2</sub>O<sub>3</sub> and Fe<sub>2</sub>O<sub>3</sub> by two DES-like solvents; GUC: lactic acid and GUC: acetic acid were investigated. To investigate the influence of the separate

<sup>1</sup> Current address: Instituto de Carboquímica (ICB-CSIC), C/Miguel Luesma Castán, 4, 50018, Zaragoza, Spain.

<sup>2</sup> Current address: Research and Development Agency of Aragon (ARAID) Foundation, Zaragoza, Spain.

components of these mixtures – HBA or HBD – with water mixtures, water was used in the same ratio as the component it replaced. Thus, GUC-water, lactic acid-water, and acetic acid-water were prepared with molar ratios of HBA:water, and HBD:water of 1:6, and 6:1, respectively. All the solvents were prepared by mixing the components for 3 h at 50 °C with 500 rpm.

To understand the dissolution mechanism, the experiments were performed in different steps: (i) separate leaching of Nd<sub>2</sub>O<sub>3</sub> and Fe<sub>2</sub>O<sub>3</sub> in the above-mentioned mixtures (ii) leaching of Nd<sub>2</sub>O<sub>3</sub> and Fe<sub>2</sub>O<sub>3</sub> mixtures with the mass fraction ratio of 1:1 (iii) leaching of Nd<sub>2</sub>O<sub>3</sub> and Fe<sub>2</sub>O<sub>3</sub> mixtures at around the same mass fraction ratio as REE magnet composition (1:7 wt.%) delivered by AMF magnetics.

A 10 mg solid sample was placed in a glass vial and 1.5 mL of solvent was added. The glass vial was immersed in thermal beads to ensure a uniform temperature distribution in the samples. The reaction mixture was then heated at 50 °C and stirred at 500 rpm for 24 h. Then, the solution obtained from the leaching experiments was filtered using a syringe filter (PTFE Filter, pore size: 0.22 µm, diameter: 30 mm, Membrane Solutions, LLC) and the filtrate was analysed using Inductively coupled plasma mass spectrometry (ICP-MS). The leaching efficiency (L %) was calculated as follows:

$$L = \frac{w_{M^{n+}}(l)}{w_{M^{n+}}(i)} \times 100 \% \quad (1)$$

where  $w_{M^{n+}}(i)$  is initial mass concentration of metal in solvent before leaching,  $w_{M^{n+}}(l)$  is the calculated mass concentration of metal in solvent after leaching.

A selectivity factor (SF) was calculated to determine the extent of preferential dissolution of one element over another (A and B respectively) in a mixture, according to the following equation from the literature<sup>28</sup>:

$$SF_{A/B} = \frac{\frac{L_A}{1 - L_A}}{\frac{L_B}{1 - L_B}} \quad (2)$$

where  $L_A$  and  $L_B$  are the leaching efficiencies of elements A and B, respectively.

### **1.3. Analytical and characterization methods**

Inductively coupled plasma mass spectrometry (ICP-MS, PerkinElmer NexION 350X) was employed to determine the concentration of metals in the solution (leachate) after leaching experiments. ICP samples were prepared by diluting the leachate with 2 % (v/v) nitric acid.

X-ray Powder Diffraction (XRD) characterization was performed between 20 and 100° on a Panalytical X'pert Powder powder diffractometer fitted with a 10 mm slit. XRD measurements were performed to analyse the phase composition of Fe<sub>2</sub>O<sub>3</sub> before and after leaching. Fe<sub>2</sub>O<sub>3</sub> before leaching was directly used for the XRD measurement. Fe<sub>2</sub>O<sub>3</sub> after leaching was filtered from the leachate using a syringe filter (PTFE Filter, pore size: 0.22 µm, diameter: 30 mm, Membrane Solutions, LLC) and the residue analysed using XRD.
